# Supplementary material
Source: bioRxiv or medRxiv preprint supplement (https://www.biorxiv.org/highwire/filestream/66049/field_highwire_adjunct_files/4/216754-4.pdf)

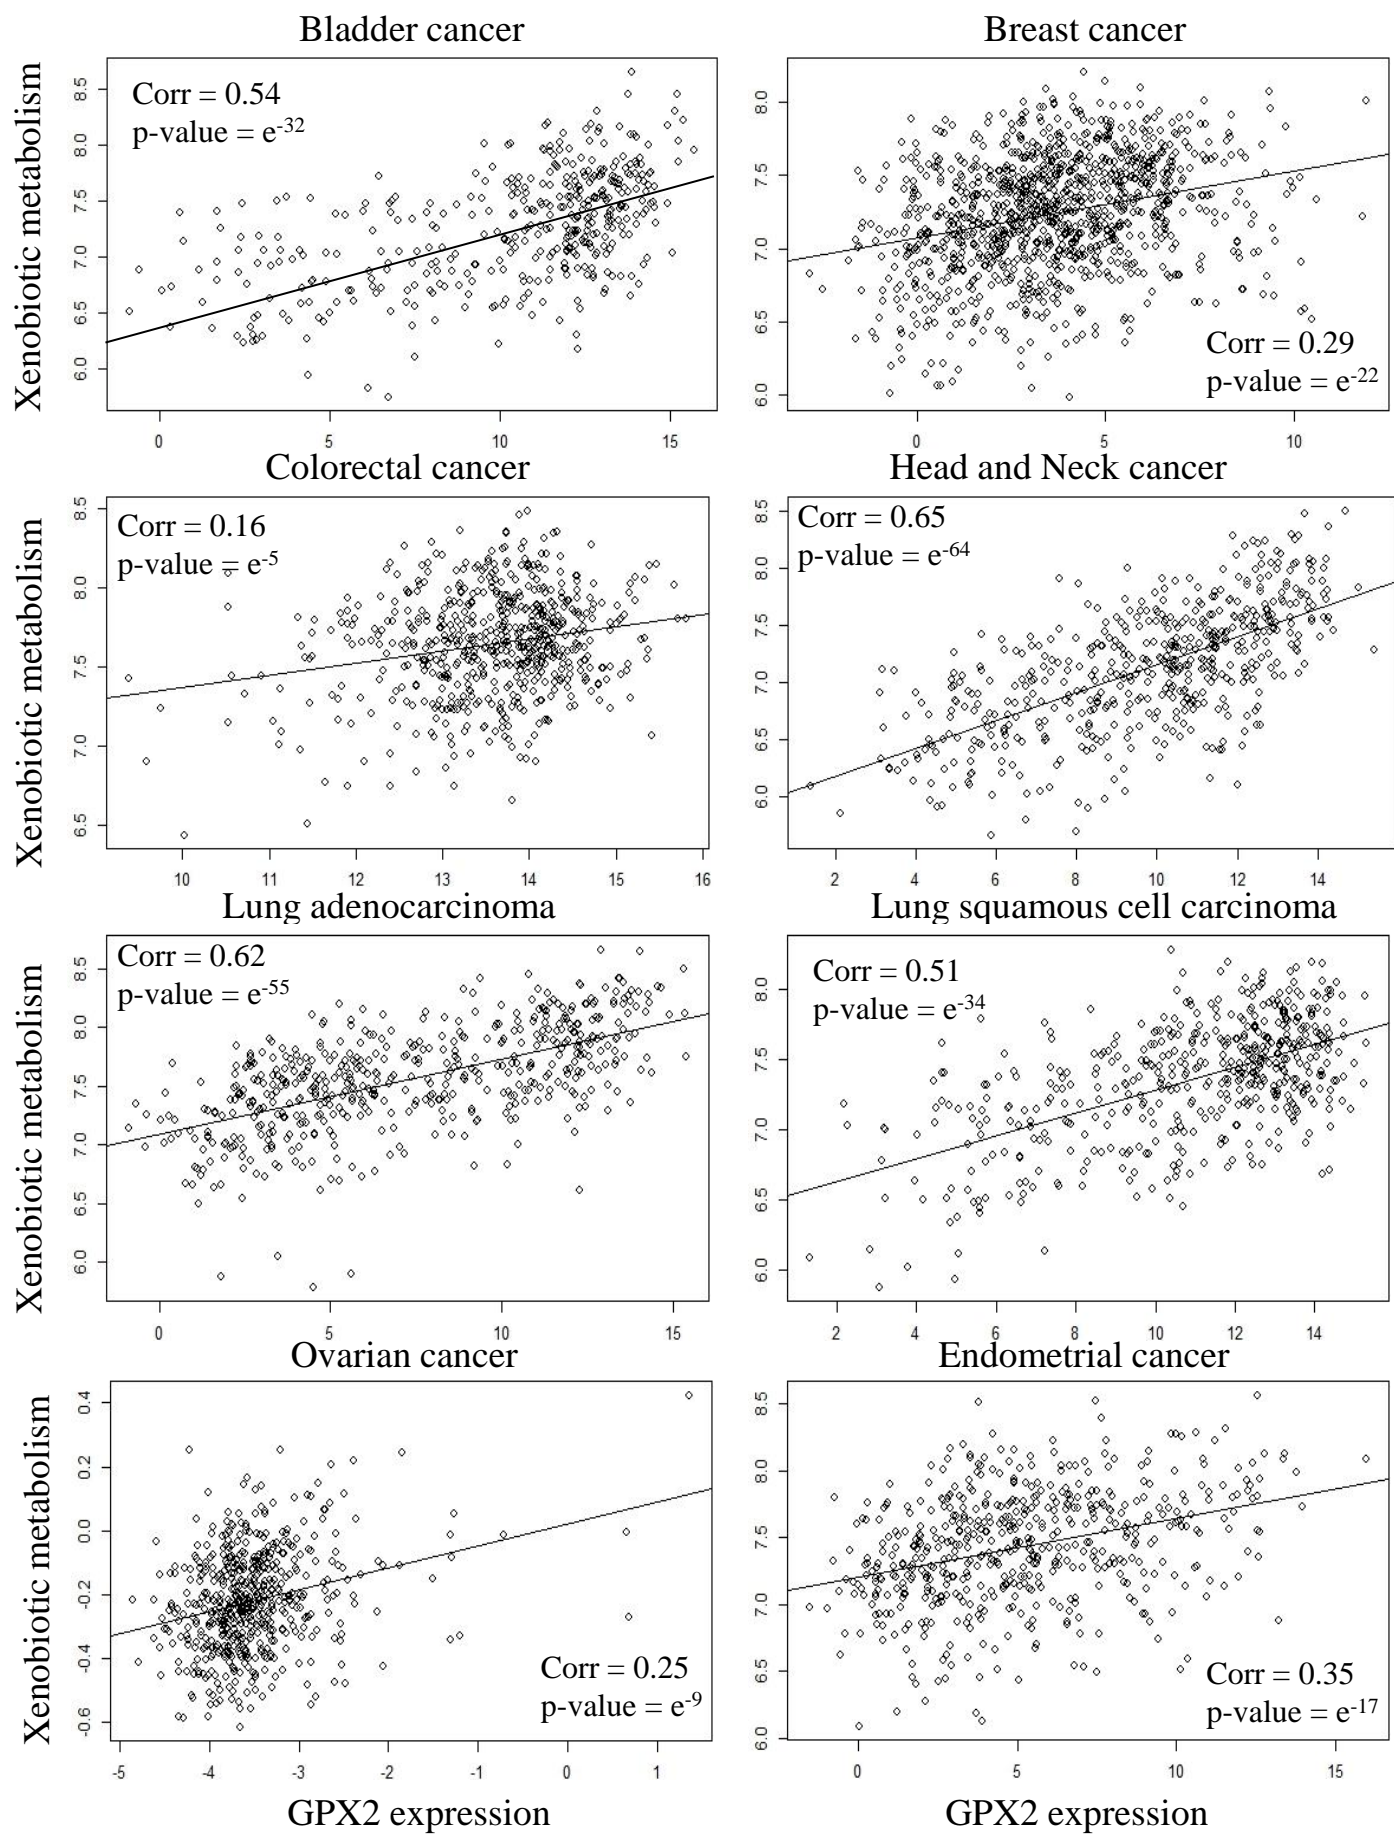

Supplement: Supplementary file [file 216754-4.pdf]
